# Supplementary material for: Coffee Consumption and Cardiovascular Diseases: A Mendelian Randomization Study
Source: MDPI journal article supplement (doi:10.3390/nu13072218), 2021-06-28
Supplement: s1 [file s1]

## Supporting information for

### Coffee consumption and cardiovascular disease: a Mendelian randomization study

*Shuai Yuan, Amy M. Mason, Paul Carter, Stephen Burgess, Susanna C. Larsson*

**Supplementary Table S1.** Genetic instruments for coffee consumption

**Supplementary Table S2.** Diagnostic information on cardiovascular endpoints in UK Biobank

**Supplementary Table S3.** Diagnostic information on cardiovascular endpoints in FinnGen consortium

**Supplementary Table S4.** Associations of genetically predicted coffee consumption with cardiovascular diseases in sensitivity analyses in UK Biobank

**Supplementary Table S5.** Associations of genetically predicted coffee consumption with cardiovascular diseases in sensitivity analyses in FinnGen consortium

**Supplementary Figure S1.** Associations of genetically predicted coffee consumption with cardiovascular diseases based on rs2472297 and rs4410790

**Supplementary Figure S2.** Associations of genetically predicted coffee consumption with cardiovascular diseases in multivariable MR analysis with adjustment for body mass index

**Supplementary Figure S3.** Associations of genetically predicted coffee consumption with cardiovascular diseases in multivariable MR analysis with adjustment for smoking initiation

**Supplementary Table S1. Genetic instruments for coffee consumption**

| SNP        | pos_hg19     | EA | NEA | EAF  | Beta | SE   | P         | Nearby gene            |
|------------|--------------|----|-----|------|------|------|-----------|------------------------|
| rs597045   | 11:56272114  | A  | T   | 0.69 | 1.07 | 0.16 | 6.62E-11  | <i>OR8U8</i>           |
| rs1956218  | 14:33075243  | G  | A   | 0.56 | 0.82 | 0.15 | 3.62E-08  | <i>AKAP6</i>           |
| rs2472297  | 15:75027880  | T  | C   | 0.27 | 4.54 | 0.17 | 5.19E-155 | <i>CYP1A1/2</i>        |
| rs66723169 | 18:57808978  | A  | C   | 0.23 | 1.47 | 0.18 | 9.88E-17  | <i>MC4R</i>            |
| rs574367   | 01:177873210 | T  | G   | 0.21 | 1.05 | 0.18 | 8.06E-09  | <i>SEC16B</i>          |
| rs2330783  | 22:24747031  | G  | T   | 0.99 | 4.53 | 0.63 | 1.57E-12  | <i>SPECC1L-ADORA2A</i> |
| rs1260326  | 02:27730940  | C  | T   | 0.61 | 1.36 | 0.15 | 2.62E-19  | <i>GCKR</i>            |
| rs10865548 | 02:631606    | G  | A   | 0.83 | 1.54 | 0.19 | 4.46E-15  | <i>TMEM18</i>          |
| rs4410790  | 07:17284577  | C  | T   | 0.63 | 3.94 | 0.15 | 5.59E-141 | <i>AHR</i>             |
| rs73073176 | 07:17562952  | C  | T   | 0.87 | 2.31 | 0.22 | 5.56E-25  | <i>LOC101927630</i>    |
| rs34060476 | 07:73037956  | G  | A   | 0.13 | 1.89 | 0.22 | 5.06E-18  | <i>MLXIPL</i>          |
| rs1057868  | 07:75615006  | T  | C   | 0.29 | 1.97 | 0.16 | 5.26E-33  | <i>POR</i>             |

EA, effect allele; EAF, effect allele frequency; NEA, non-effect allele; SE, standard error; SNP, single nucleotide polymorphism.

**Supplementary Table S2.** Diagnostic information on cardiovascular endpoints in UK Biobank

| Outcome                     | ICD-9 diagnosis                                                             | ICD-10 diagnosis                                             | OPCS procedure                                                   | Self-report†           |
|-----------------------------|-----------------------------------------------------------------------------|--------------------------------------------------------------|------------------------------------------------------------------|------------------------|
| Abdominal aneurysm          | 441.3, 441.4                                                                | I71.3, I71.4                                                 | L19.4, L19.5                                                     | 20002                  |
| Atrial fibrillation         | 427.3                                                                       | I48                                                          | -                                                                | 20002                  |
| Aortic valve stenosis       | -                                                                           | I35.0, I35.2                                                 | -                                                                | 20002                  |
| Coronary artery disease     | 410, 411, 412, 414.0, 414.8, 414.9                                          | I21, I22, I23, I24, I25.1, I25.2, I25.5, I25.6, I25.8, I25.9 | K40, K41, K42, K43, K44, K45, K46, K49, K50.1, K50.2, K50.4, K75 | 20002, 20004, 6150     |
| Deep vein thrombosis        | 451.1                                                                       | I80.2                                                        | L90.2                                                            | 20002, 6152            |
| Heart failure               | 402.01, 402.11, 402.91, 404.01, 404.11, 404.91, 404.03, 404.13, 404.93, 428 | I11.0, I13.0, I13.2, I50                                     | -                                                                | 20002                  |
| Intracerebral hemorrhage    | 431                                                                         | I61                                                          | -                                                                | 20002                  |
| Ischemic stroke             | 434, 436                                                                    | I63, I64                                                     | -                                                                | 20002                  |
| Peripheral arterial disease | 443.8, 443.9                                                                | I73.8, I73.9                                                 | -                                                                | 20002                  |
| Pulmonary embolism          | 415.1                                                                       | I26                                                          | -                                                                | 20002, 6152            |
| Stroke                      | 430.X, 431.X, 434.X, 436.X                                                  | I60.X, I61.X, I63.X, I64.X                                   | -                                                                | 1081, 1086, 1491, 1583 |
| Subarachnoid hemorrhage     | 430                                                                         | I60                                                          | -                                                                | 20002                  |
| Thoracic aortic aneurysm    | 441.1, 441.2                                                                | I71.1, I71.2                                                 | -                                                                | 20002                  |
| Transient ischemic attack   | 435                                                                         | G45                                                          | -                                                                | 20002                  |
| Venous thromboembolism      | 415.1, 451.1, 452, 453.0, 453.4, 453.9                                      | I26, I80.1, I80.2, I81, I82.0                                | L90.2                                                            | 20002, 6152            |

ICD, International Classification of Disease; OPCS, Office of Population Censuses and Surveys Classification of Surgical Operations and Procedures.

†Numbers refer to data codes used in UK Biobank: 6150/6152 = Health condition diagnosed by doctor (self-reported); 6177 = Medication for health condition (self-reported); 20002 = Non-cancer illness code (self-reported from interview with nurse); 20004 = Surgical operation code (self-reported from interview with nurse).

**Supplementary Table S3.** Diagnostic information on cardiovascular endpoints in FinnGen consortium

| Outcome                      | ICD-10 diagnosis                         | ICD-9 diagnosis                                     | ICD-8 diagnosis                               | KELA reimbursements codes | Medicine purchases: ATC codes |
|------------------------------|------------------------------------------|-----------------------------------------------------|-----------------------------------------------|---------------------------|-------------------------------|
| Aortic aneurysm              | I718/I713/I711/I712/I716/I719/I714/I715  | 0930A                                               | 0930 441                                      | -                         | -                             |
| Atrial fibrillation          | I48                                      | -                                                   | 42792                                         | 207 351                   | -                             |
| Non-rheumatic valve diseases | I35/I34/I36/I37                          | 424                                                 | 39[4-6] 424, exclude 4249 3940 3950 3960 3970 | -                         | -                             |
| Coronary artery disease      | I22/I200/I21/I46/I25/I23/R96/I21/R98/I24 | 410/411/412/413/414/798, exclude 7980A              | 41[0-4] 798                                   | -                         | -                             |
| Deep vein thrombosis         | I803                                     | 4510A/4511A/4512A                                   | 4510                                          | -                         | -                             |
| Heart failure                | I50/I130/I132/I110                       | 4029B/428                                           | 42700 42710 428 7824                          | -                         | C03CA01 C03EB01               |
| Intracerebral hemorrhage     | I61                                      | 431                                                 | 431                                           | -                         | -                             |
| Ischemic stroke              | I63/I64, exclude I636                    | 4330A/4331A/4339A/4340A/4341A/4349A/436             | 433 434 436                                   | -                         | -                             |
| Peripheral arterial disease  | E105/E145/E135/I739/E125/E115/I702       | -                                                   | 25006 4402 4439                               | -                         | -                             |
| Pulmonary embolism           | I26                                      | 415                                                 | 450                                           | -                         | -                             |
| Subarachnoid hemorrhage      | I60                                      | 430                                                 | 430                                           | -                         | -                             |
| Stroke                       | I60/I61/I62/I63/I64/G45                  | 430/431/4330A/4331A/4339A/4340A/4341A/4349A/435/436 | 430 431 433 434 435 436                       | -                         | -                             |
| Transient ischemic attack    | G45                                      | 435                                                 | 435                                           | -                         | -                             |
| Venous thromboembolism       | O882/I80/O871/I26, exclude I800          | 415/451, exclude 4510                               | 450 451 671 6739                              | -                         | -                             |

Diagnostic information was extracted from national registries.

**Supplementary Table S4.** Associations of genetically predicted coffee consumption with cardiovascular diseases in sensitivity analyses in UK Biobank

| Cardiovascular disease      | Weighted median method |           |       | MR-Egger regression |           |       |                        |
|-----------------------------|------------------------|-----------|-------|---------------------|-----------|-------|------------------------|
|                             | OR                     | 95% CI    | P     | OR                  | 95% CI    | P     | $P_{\text{intercept}}$ |
| Abdominal aortic aneurysm   | 1.23                   | 0.67-2.27 | 0.507 | 0.81                | 0.32-2.01 | 0.643 | 0.264                  |
| Thoracic aortic aneurysm    | 0.98                   | 0.42-2.28 | 0.957 | 1.42                | 0.38-5.31 | 0.600 | 0.587                  |
| Aortic valve stenosis       | 1.23                   | 0.86-1.77 | 0.254 | 1.26                | 0.58-2.76 | 0.558 | 0.987                  |
| Atrial fibrillation         | 1.03                   | 0.89-1.19 | 0.726 | 0.98                | 0.73-1.31 | 0.881 | 0.394                  |
| Coronary artery disease     | 0.95                   | 0.81-1.12 | 0.553 | 1.00                | 0.71-1.41 | 0.987 | 0.929                  |
| Heart failure               | 1.09                   | 0.88-1.35 | 0.453 | 0.92                | 0.65-1.29 | 0.616 | 0.324                  |
| Stroke                      | 1.05                   | 0.87-1.27 | 0.605 | 1.16                | 0.86-1.57 | 0.335 | 0.388                  |
| Intracerebral hemorrhage    | 0.95                   | 0.53-1.71 | 0.875 | 0.85                | 0.37-1.96 | 0.699 | 0.708                  |
| Subarachnoid hemorrhage     | 1.32                   | 0.75-2.33 | 0.337 | 1.79                | 0.73-4.38 | 0.206 | 0.357                  |
| Ischemic stroke             | 0.91                   | 0.70-1.19 | 0.501 | 0.89                | 0.60-1.34 | 0.580 | 0.645                  |
| Transient ischemic attack   | 0.93                   | 0.69-1.27 | 0.655 | 0.96                | 0.54-1.73 | 0.902 | 0.784                  |
| Venous thromboembolism      | 1.07                   | 0.90-1.27 | 0.454 | 0.99                | 0.74-1.32 | 0.937 | 0.181                  |
| Deep vein thrombosis        | 1.14                   | 0.93-1.41 | 0.210 | 0.95                | 0.63-1.44 | 0.809 | 0.120                  |
| Pulmonary embolism          | 0.96                   | 0.75-1.24 | 0.752 | 0.93                | 0.62-1.38 | 0.714 | 0.385                  |
| Peripheral arterial disease | 1.09                   | 0.79-1.48 | 0.606 | 1.07                | 0.56-2.03 | 0.843 | 0.794                  |

CI indicates confidence interval; OR, odds ratio.

$P_{\text{intercept}}$  presents the p value for the intercept in MR-Egger method and the  $P_{\text{intercept}} > 0.05$  indicates no pleiotropy.

**Supplementary Table S5.** Associations of genetically predicted coffee consumption with cardiovascular diseases in sensitivity analyses in FinnGen consortium

| Cardiovascular disease       | Weighted median method |           |       | MR-Egger regression |           |       |                        |
|------------------------------|------------------------|-----------|-------|---------------------|-----------|-------|------------------------|
|                              | OR                     | 95% CI    | P     | OR                  | 95% CI    | P     | $P_{\text{intercept}}$ |
| Aortic aneurysm              | 1.02                   | 0.61-1.7  | 0.945 | 1.02                | 0.45-2.32 | 0.967 | 0.829                  |
| Non-rheumatic valve diseases | 1.03                   | 0.78-1.37 | 0.834 | 1.32                | 0.81-2.14 | 0.266 | 0.252                  |
| Atrial fibrillation          | 1.11                   | 0.86-1.43 | 0.419 | 0.93                | 0.63-1.38 | 0.731 | 0.165                  |
| Coronary artery disease      | 1.13                   | 0.91-1.4  | 0.265 | 1.07                | 0.72-1.6  | 0.729 | 0.804                  |
| Heart failure                | 0.92                   | 0.71-1.2  | 0.559 | 0.89                | 0.57-1.37 | 0.587 | 0.658                  |
| Stroke                       | 1.20                   | 0.97-1.48 | 0.098 | 1.44                | 1.03-2    | 0.034 | 0.109                  |
| Intracerebral hemorrhage     | 1.66                   | 0.88-3.14 | 0.118 | 2.29                | 0.86-6.05 | 0.096 | 0.210                  |
| Subarachnoid hemorrhage      | 0.68                   | 0.33-1.39 | 0.286 | 0.48                | 0.17-1.39 | 0.176 | 0.206                  |
| Ischemic stroke              | 1.21                   | 0.94-1.56 | 0.144 | 1.39                | 0.93-2.06 | 0.105 | 0.262                  |
| Transient ischemic attack    | 1.15                   | 0.87-1.52 | 0.324 | 1.74                | 1.13-2.69 | 0.012 | 0.007                  |
| Venous thromboembolism       | 1.00                   | 0.76-1.31 | 0.985 | 1.01                | 0.66-1.55 | 0.957 | 0.816                  |
| Deep vein thrombosis         | 1.19                   | 0.81-1.76 | 0.371 | 0.91                | 0.51-1.62 | 0.740 | 0.417                  |
| Pulmonary embolism           | 0.84                   | 0.56-1.26 | 0.396 | 0.96                | 0.47-2    | 0.923 | 0.957                  |
| Peripheral arterial disease  | 0.90                   | 0.61-1.31 | 0.571 | 0.98                | 0.4-2.43  | 0.966 | 0.777                  |

CI indicates confidence interval; OR, odds ratio.

$P_{\text{intercept}}$  presents the p value for the intercept in MR-Egger method and the  $P_{\text{intercept}} > 0.05$  indicates no pleiotropy.

Aortic aneurysm included abdominal and thoracic aortic aneurysm in FinnGen. Data for non-rheumatic valve diseases was used to replicate the association for aortic valve stenosis in FinnGen.

**Supplementary Figure S1.** Associations of genetically predicted coffee consumption with cardiovascular diseases based on rs2472297 and rs4410790

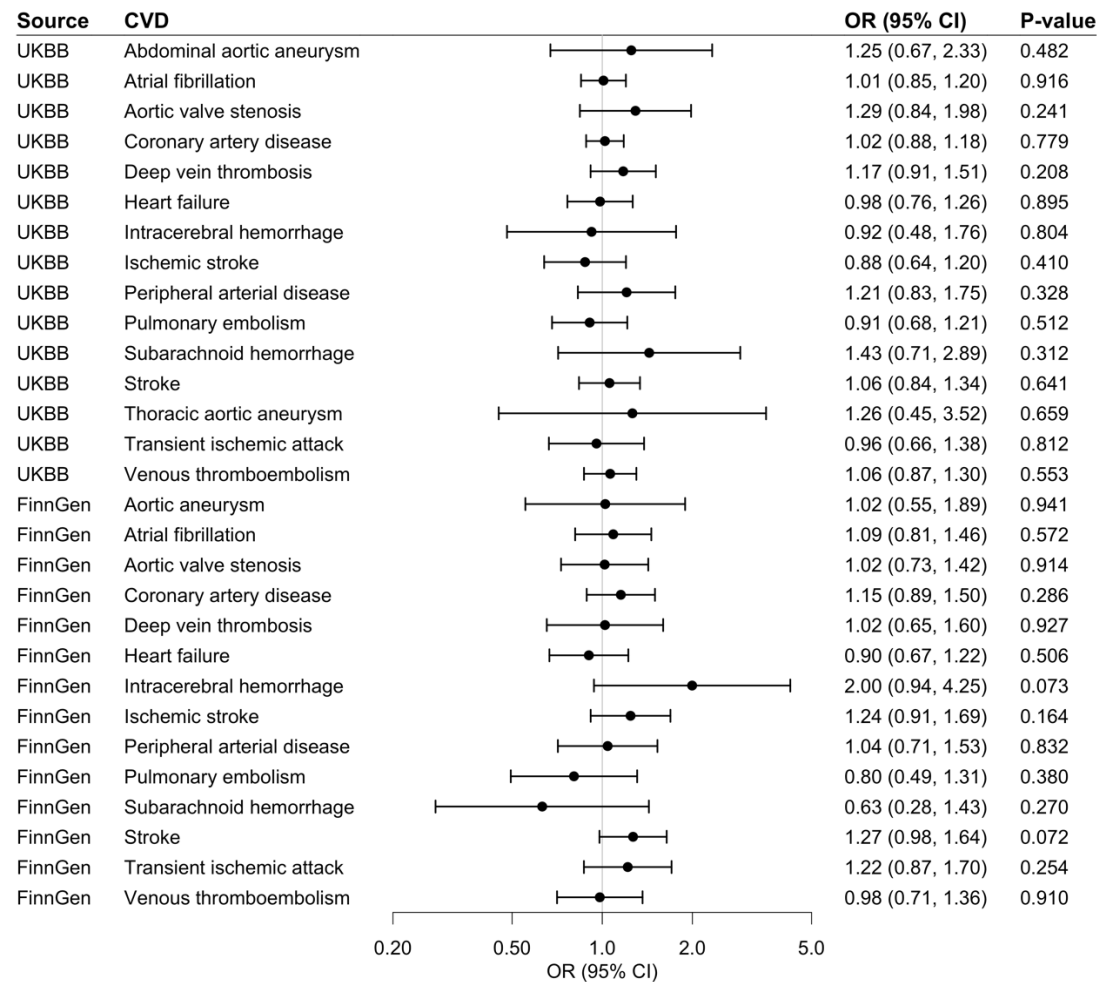

CI, confidence interval; CVD, cardiovascular disease; OR, odds ratio. Aortic aneurysm included abdominal and thoracic aortic aneurysm in FinnGen.

**Supplementary Figure S2.** Associations of genetically predicted coffee consumption with cardiovascular diseases in multivariable Mendelian randomization analysis with adjustment for body mass index

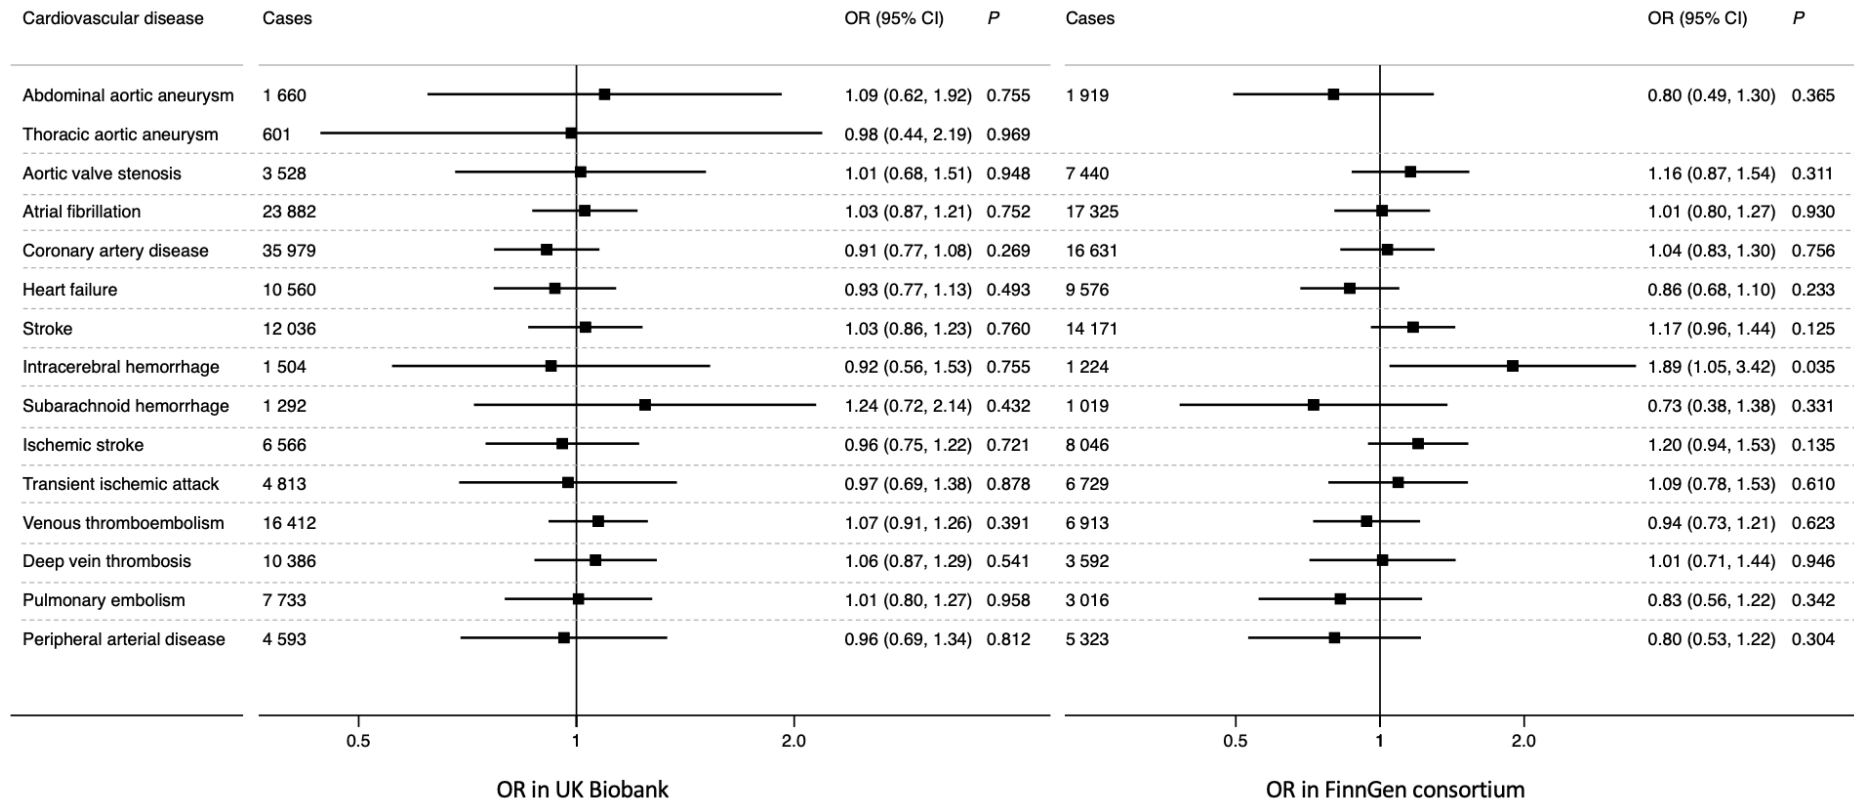

CI indicates confidence interval; OR, odds ratio.

Aortic aneurysm included abdominal and thoracic aortic aneurysm in FinnGen. Data for non-rheumatic valve diseases was used to replicate the association for aortic valve stenosis in FinnGen.



**Supplementary Figure S3.** Associations of genetically predicted coffee consumption with cardiovascular diseases in multivariable Mendelian randomization analysis with adjustment for smoking initiation

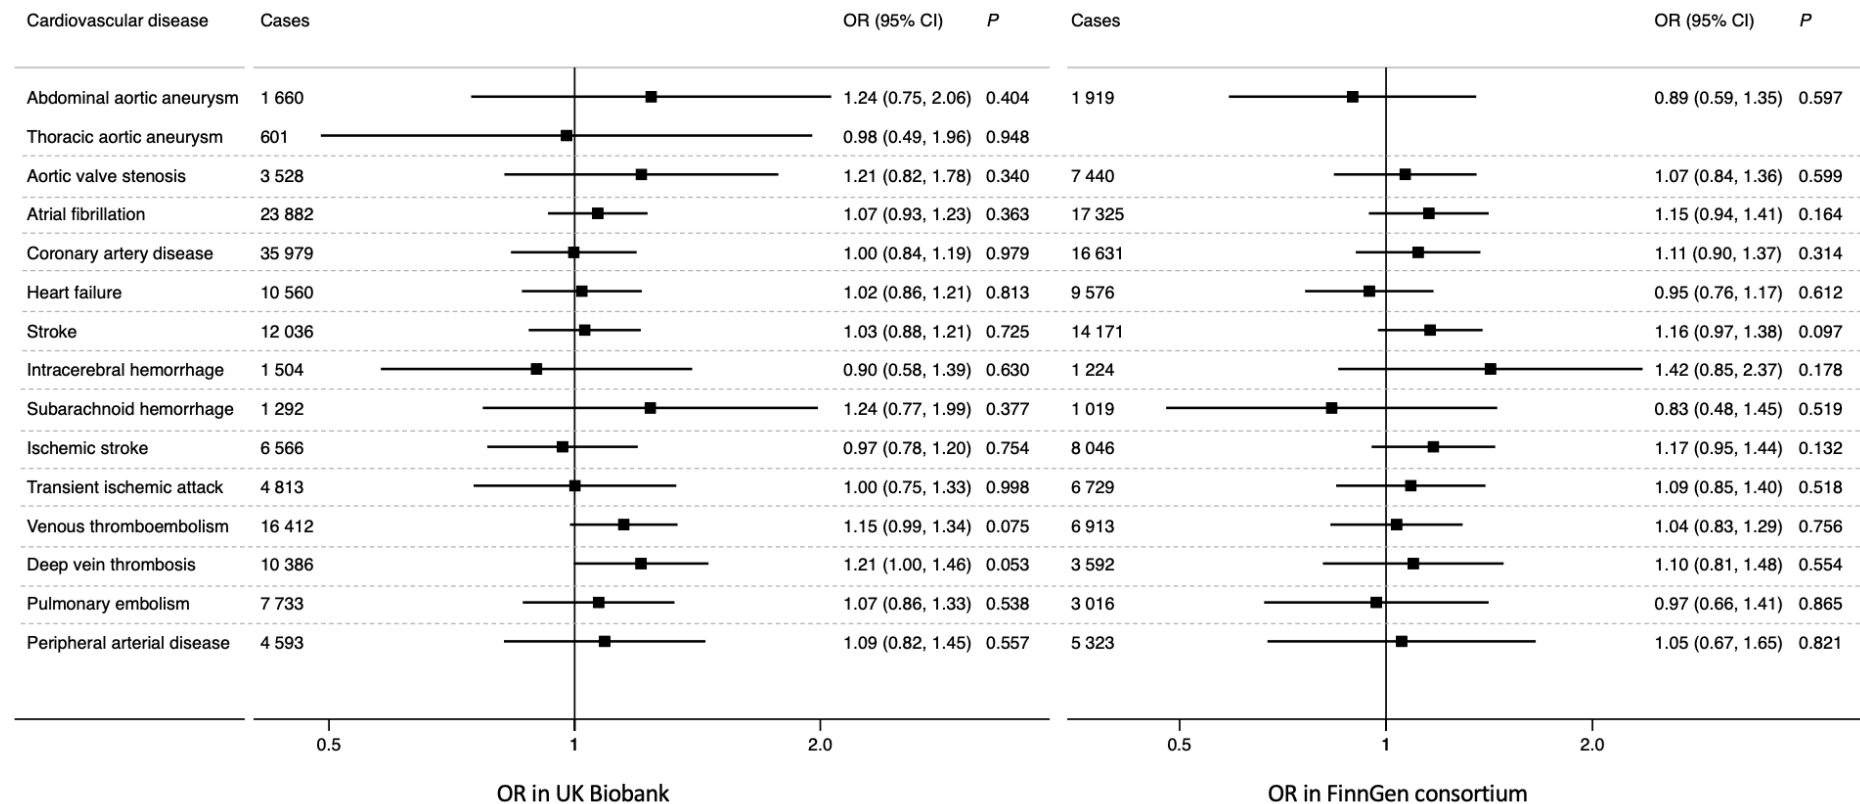

CI indicates confidence interval; OR, odds ratio.

Aortic aneurysm included abdominal and thoracic aortic aneurysm in FinnGen. Data for non-rheumatic valve diseases was used to replicate the association for aortic valve stenosis in FinnGen.
